# Supplementary material
Source: Springer Nature journal article supplement (https://www.springermedizin.de/resource/supplementary/12985_2014_2483_MOESM6_ESM.pdf/9606846)

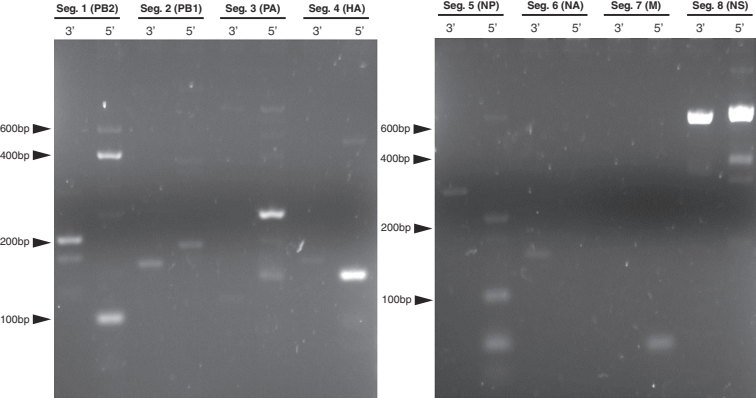

Supplement: MOESM6 [file 9606846]
